# Supplementary material for: The Pan-RAF–MEK Nondegrading Molecular Glue NST-628 Is a Potent and Brain-Penetrant Inhibitor of the RAS–MAPK Pathway with Activity across Diverse RAS- and RAF-Driven Cancers
Source: PubMed Central journal article supplement — Cancer Discov. 2024 Apr 19;14(7):1190–205. doi: 10.1158/2159-8290.CD-24-0139 (PMC11215411; doi:10.1158/2159-8290.cd-24-0139), 2024-04-19
Supplement: cd-24-0139_supplementary_figures_s1-s12_suppsf1.pdf [file cd-24-0139_supplementary_figures_s1-s12_suppsf1.pdf]

# Supplementary Figure S1

Related to Figure 1

**A**

|                                                           | <b>NST-628</b> | <b>Trametinib</b> | <b>Avutometinib</b> |
|-----------------------------------------------------------|----------------|-------------------|---------------------|
| pMEK IC <sub>50</sub> (nM) HCT116 (KRAS <sup>G13D</sup> ) | 0.31           | 1.9               | 7.2                 |
| pMEK IC <sub>50</sub> (nM) A549 (KRAS <sup>G12S</sup> )   | 0.26           | 1.4               | 3.8                 |
| pERK IC <sub>50</sub> (nM) HCT116 (KRAS <sup>G13D</sup> ) | 0.1            | 0.82              | 0.22                |
| pERK IC <sub>50</sub> (nM) A549 (KRAS <sup>G12S</sup> )   | 0.11           | 1.2               | 0.18                |

**B**

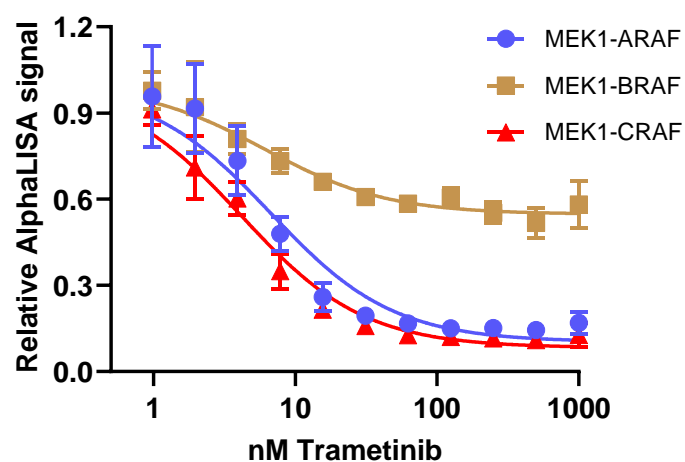

|           | <b>IC50 (nM)</b> | <b>Top</b> |
|-----------|------------------|------------|
| MEK1-ARAF | 6.7              | 0.13       |
| MEK1-BRAF | 6.0              | 0.51       |
| MEK1-CRAF | 4.1              | 0.08       |

**Supplementary Figure S1.** (A) HCT116 and A549 cells were treated with a dose response of NST-628, trametinib, or avutometinib for 2 h and pathway inhibition was measured by phospho-MEK AlphaLISA or phospho-ERK HTRF. (B) MEK1-RAF complex formation monitored by AlphaLISA protein-protein interaction assays after treatment with various concentrations of trametinib for 30 min at RT.

# Supplementary Figure S2

Related to Figure 2

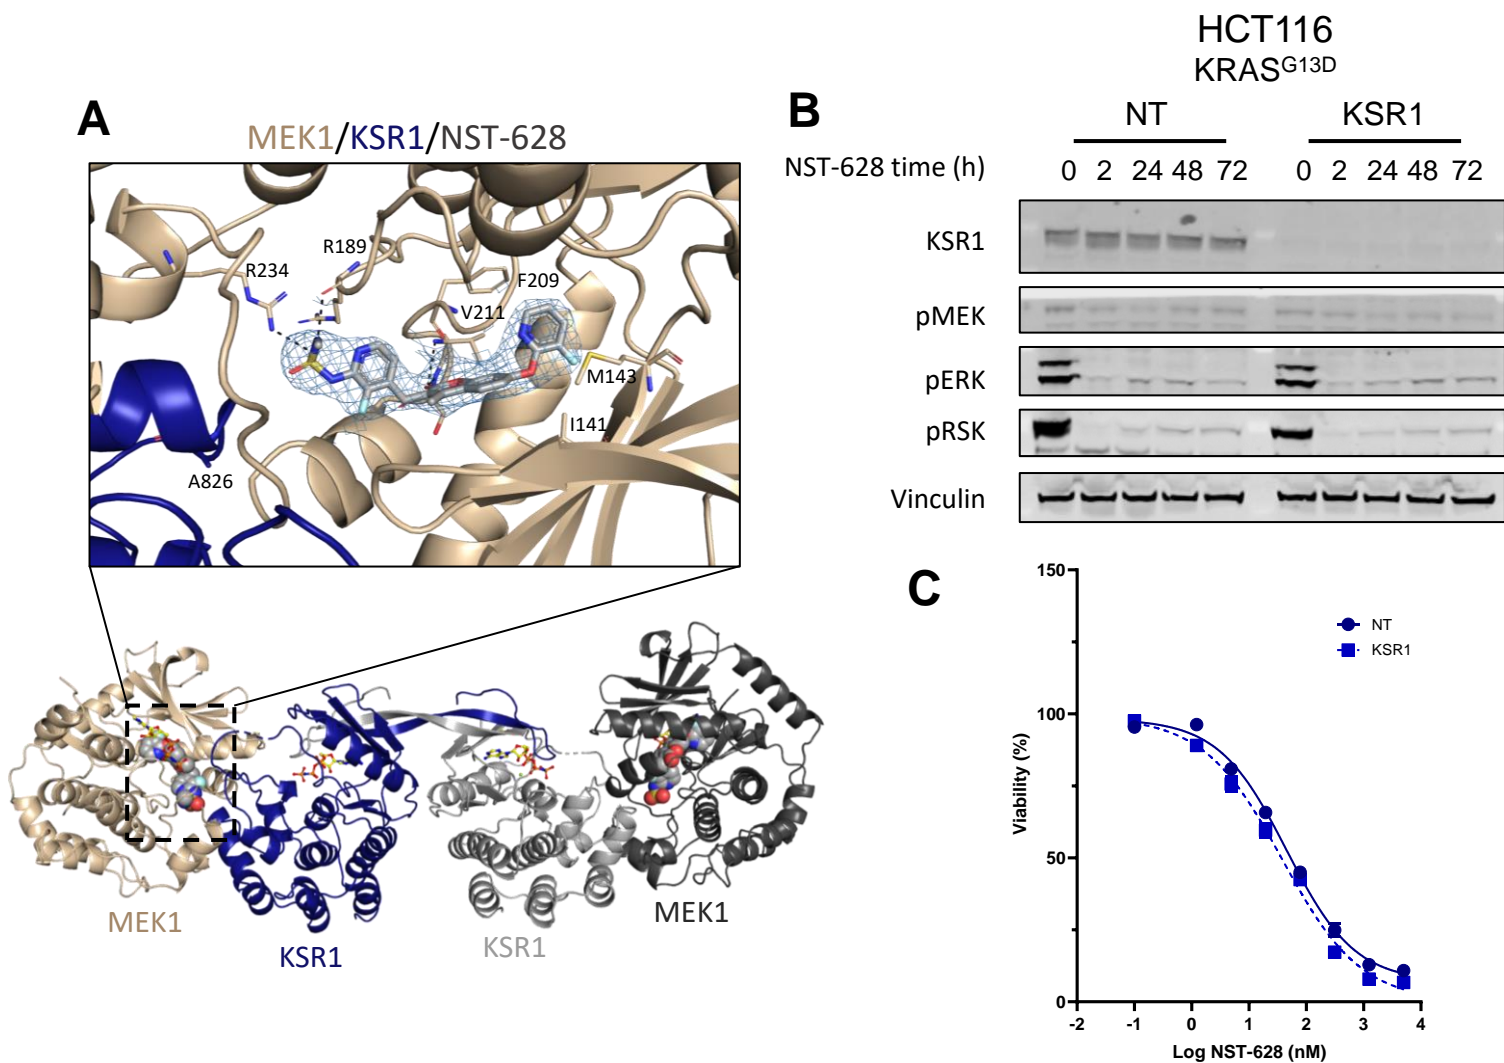

**Supplementary Figure S2.** (A) Overview of the MEK1-KSR1 heterotetramer crystal structure (2.81Å resolution) bound to NST-628 (shown as spheres). The KSR1 dimer observed in the structure is mediated by an N-lobe domain swap. Inset shows electron density for NST-628 (blue mesh) with key interactions highlighted by black dashes. (B) Western blots and (C) 72h proliferation (CellTiter-glo) of KSR1 siRNA knockdown HCT16 cells treated with NST-628. (B) Blot analysis was performed to confirm KSR1 loss and monitor phospho-MEK, phospho-ERK, phospho-RSK, and vinculin as a loading control after 2-72 h of 10 nM NST-628 treatment (C) HCT116 NT and KSR1 knockdown cell lines were treated with a dose response of NST-628 for 72 h and viability was assessed by CellTiter-Glo.

# Supplementary Figure S3

Related to Figure 2

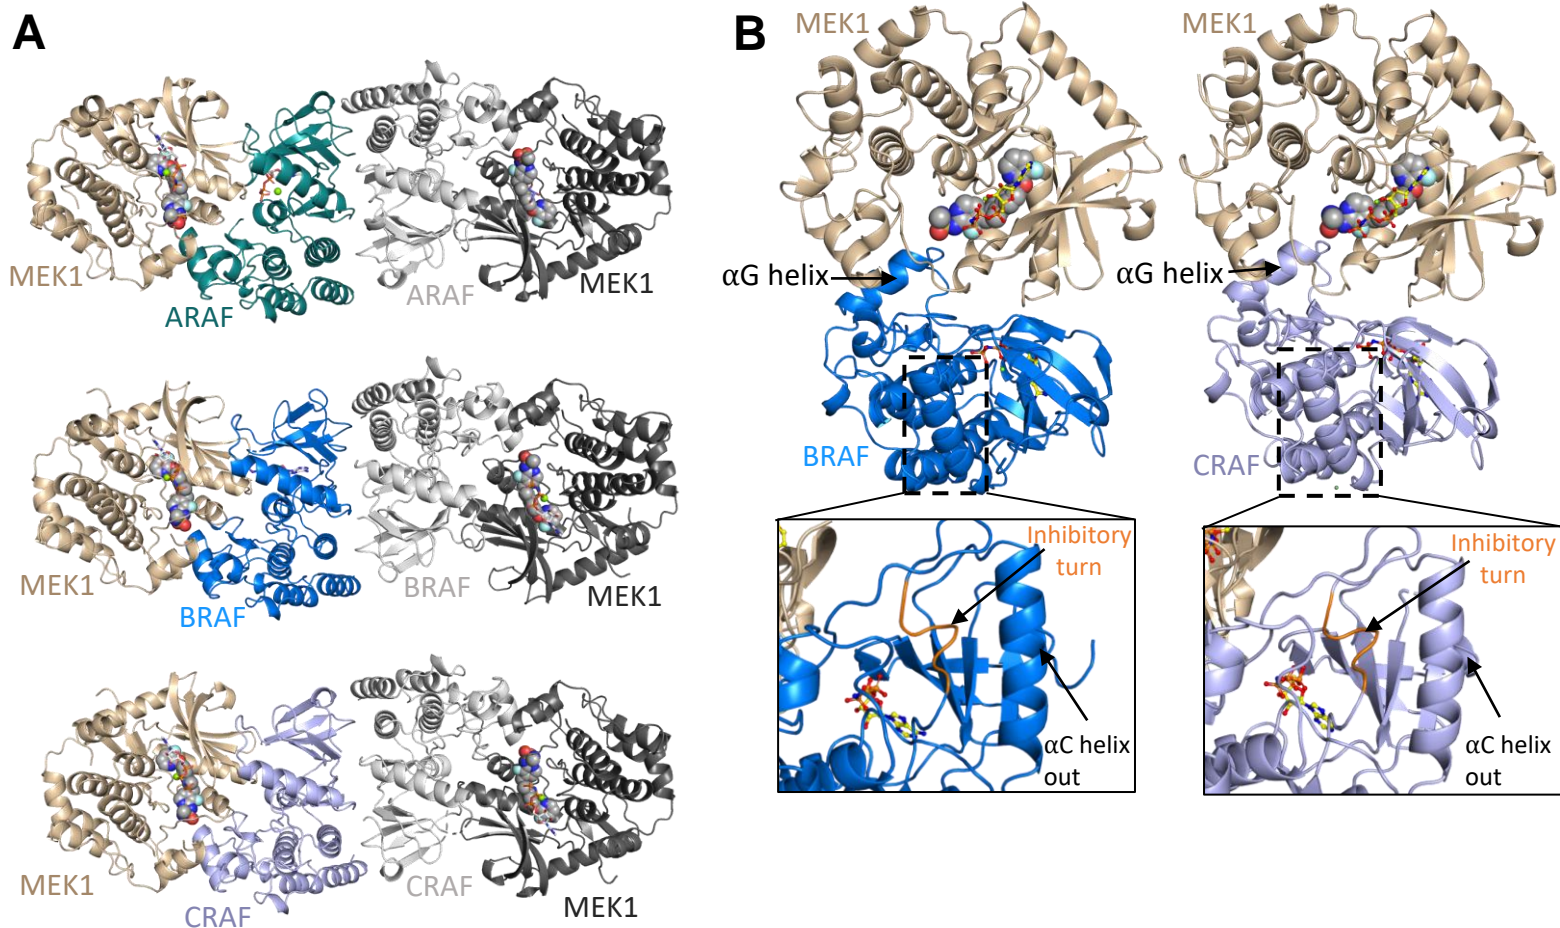

**Supplementary Figure S3.** (A) Arrangement of the MEK1-RAF heterotetramers observed in crystal structures with active RAF conformation and NST-628 (shown as spheres). Symmetry related MEK1-RAF complexes are shown in grey. (B) Overview of the crystal structures of MEK1-BRAF (3.68Å resolution) and MEK1-CRAF (2.41Å resolution) with NST-628 (shown as spheres) and inactive RAF. Insets show the outward conformation of the RAF  $\alpha$ C-helix supported by the inhibitory turn (orange).

# Supplementary Figure S4

Related to Figure 2

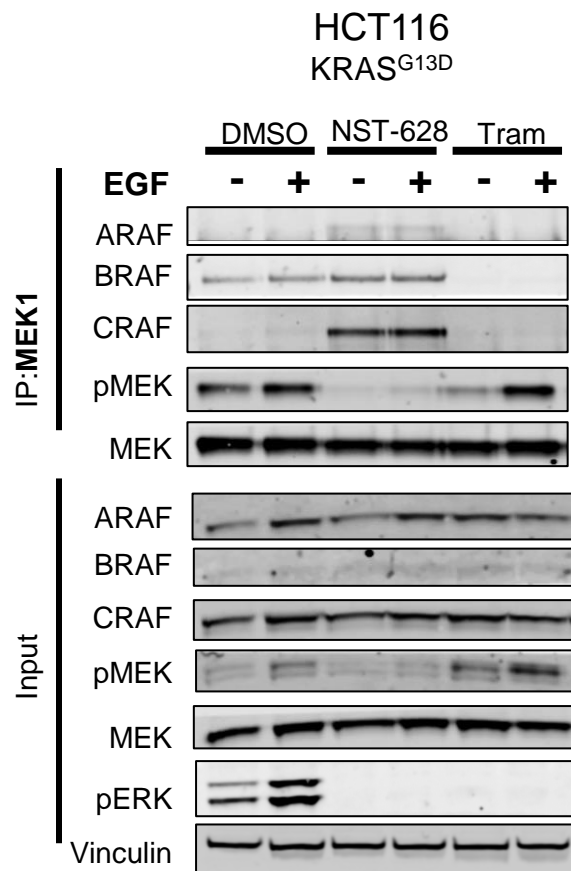

**Supplementary Figure S4.** HCT116 cells treated with 100 nM NST-628 or trametinib for 2 h and then stimulated with EGF (100 ng/ml) for 10 minutes. Samples were subjected to a MEK1 immunoprecipitation and blot analysis was performed for ARAF, BRAF, CRAF, phospho-MEK, MEK1, phospho-ERK and vinculin as a loading control

# Supplementary Figure S5

Related to Figure 2

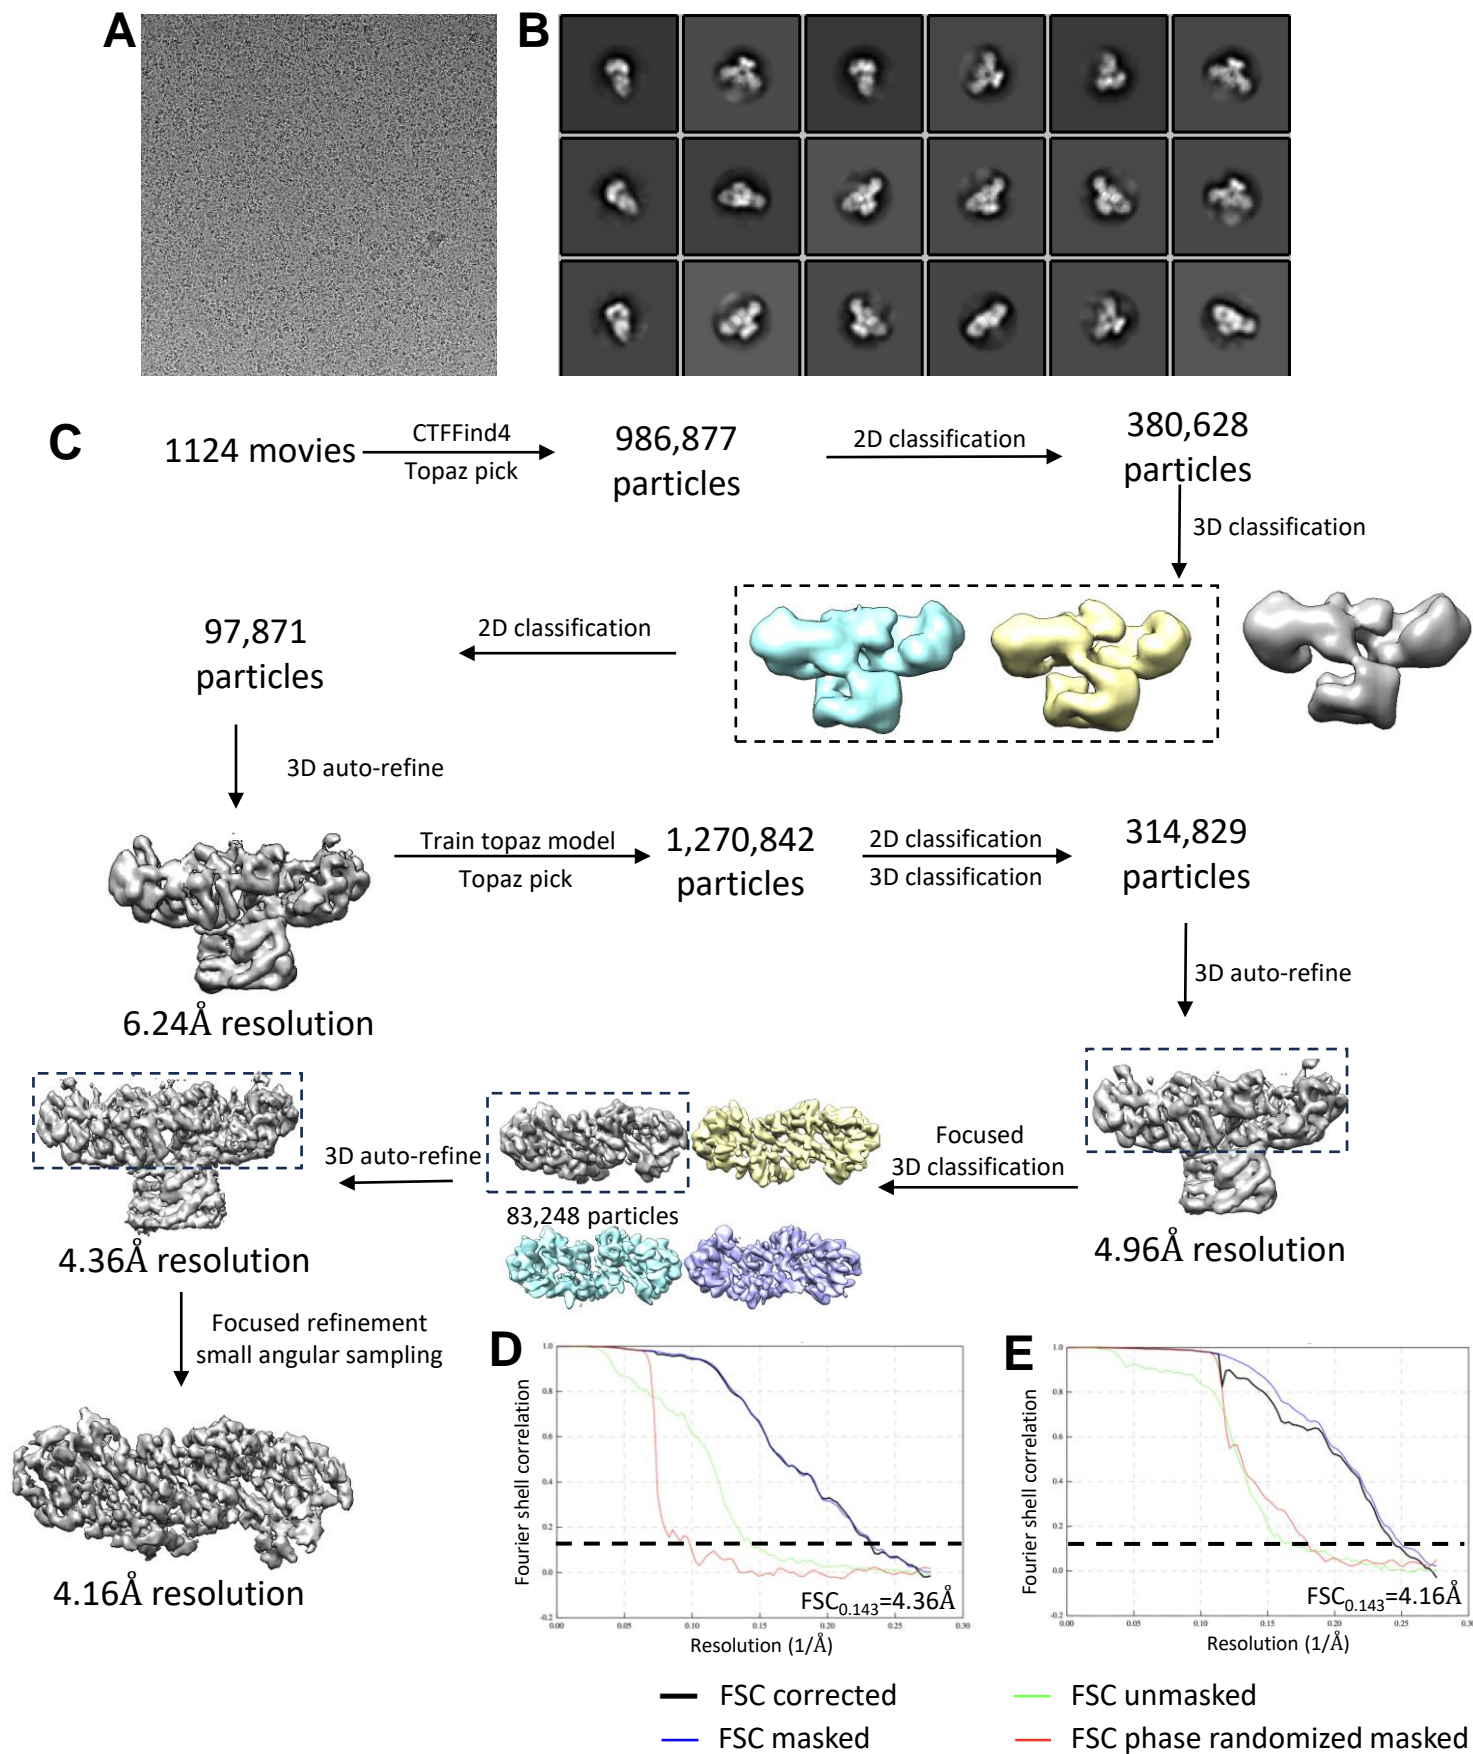

**Supplementary Figure S5.** A, Example micrograph from the MEK1-CRAF-14-3-3-NST-628 dataset. B, Example 2D classes corresponding to MEK1<sub>2</sub>-CRAF<sub>2</sub>-14-3-3<sub>2</sub> with NST-628. C, Image processing workflow for MEK1<sub>2</sub>-CRAF<sub>2</sub>-14-3-3<sub>2</sub> with NST-628. FSC curves for the 4.36Å resolution consensus refinement (D) and 4.16Å resolution focused refinement (E). Black dashed lines represent FSC<sub>0.143</sub>.

# Supplementary Figure S6

Related to Figure 3

**A**

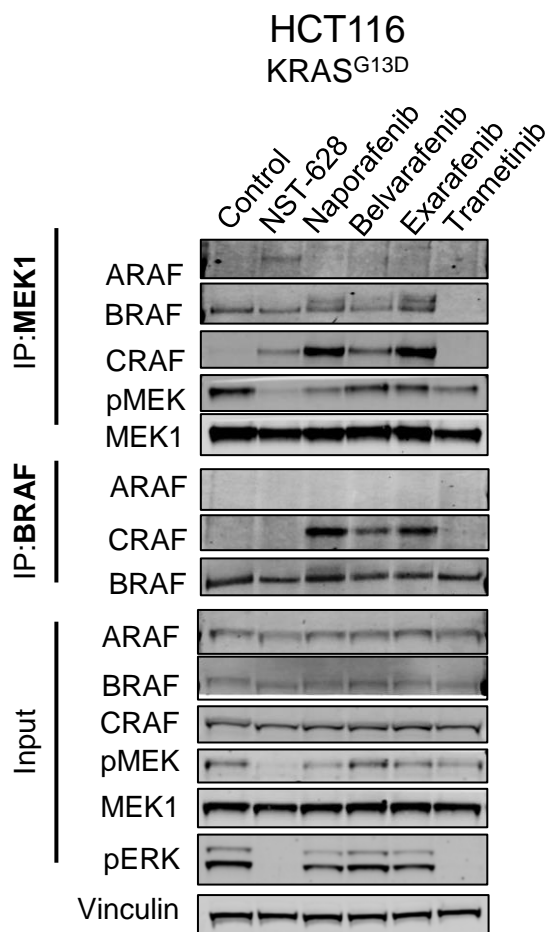

**B**

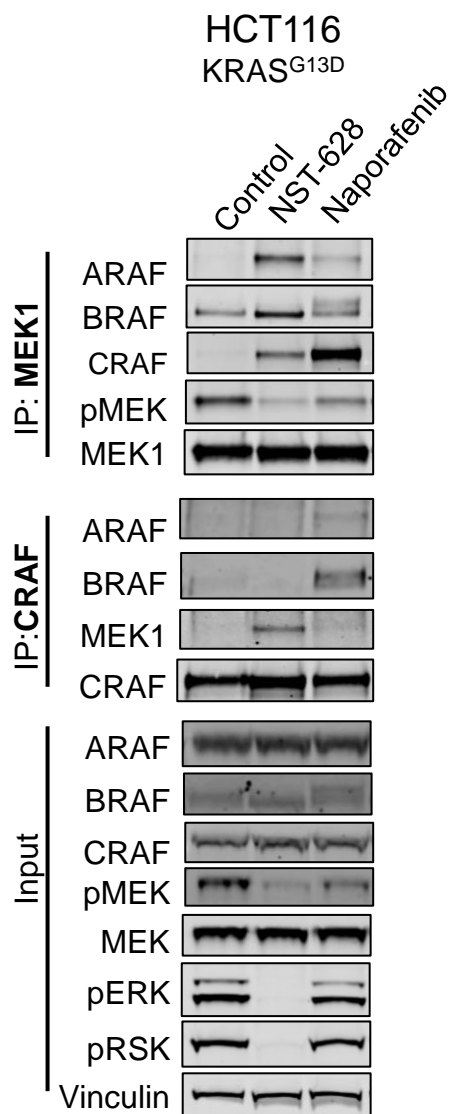

**C**

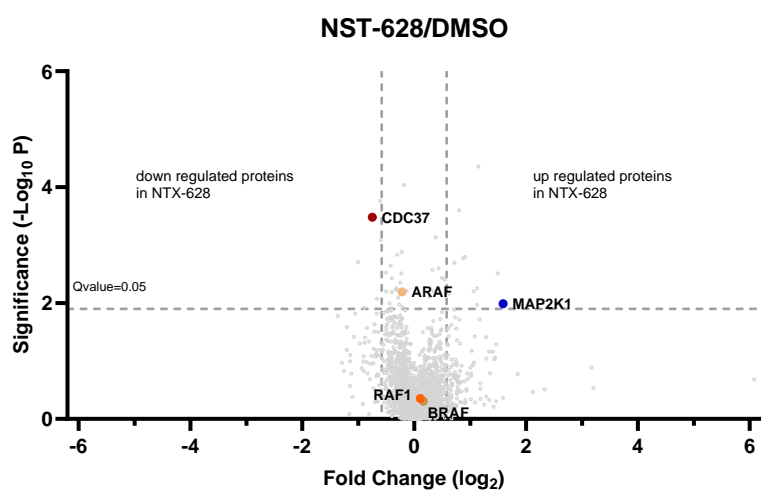

**D**

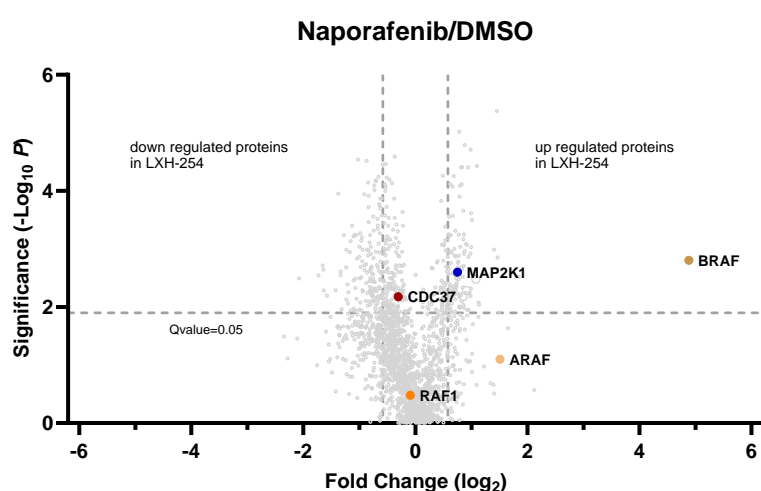

**Supplementary Figure S6.** (A) MEK1 or BRAF immunoprecipitation in HCT116 cells treated with 100 nM NST-628, naporafenib, belvarafenib, exarafenib or trametinib for 2 h and blot analysis was performed for ARAF, BRAF, CRAF, phospho-MEK, MEK1, phospho-ERK and vinculin as a loading control. (B) MEK1 or CRAF immunoprecipitation in HCT116 cells treated with 100 nM NST-628 or naporafenib for 2 h and blot analysis was performed for ARAF, BRAF, CRAF, phospho-MEK, MEK1, phospho-ERK and vinculin as a loading control CRAF immunoprecipitation and mass spectrometry of cells treated with (C) NST-628 or (D) naporafenib. Samples were normalized to DMSO for expression of CRAF interacting proteins.



# Supplementary Figure S7

Related to Figure 4

**A**

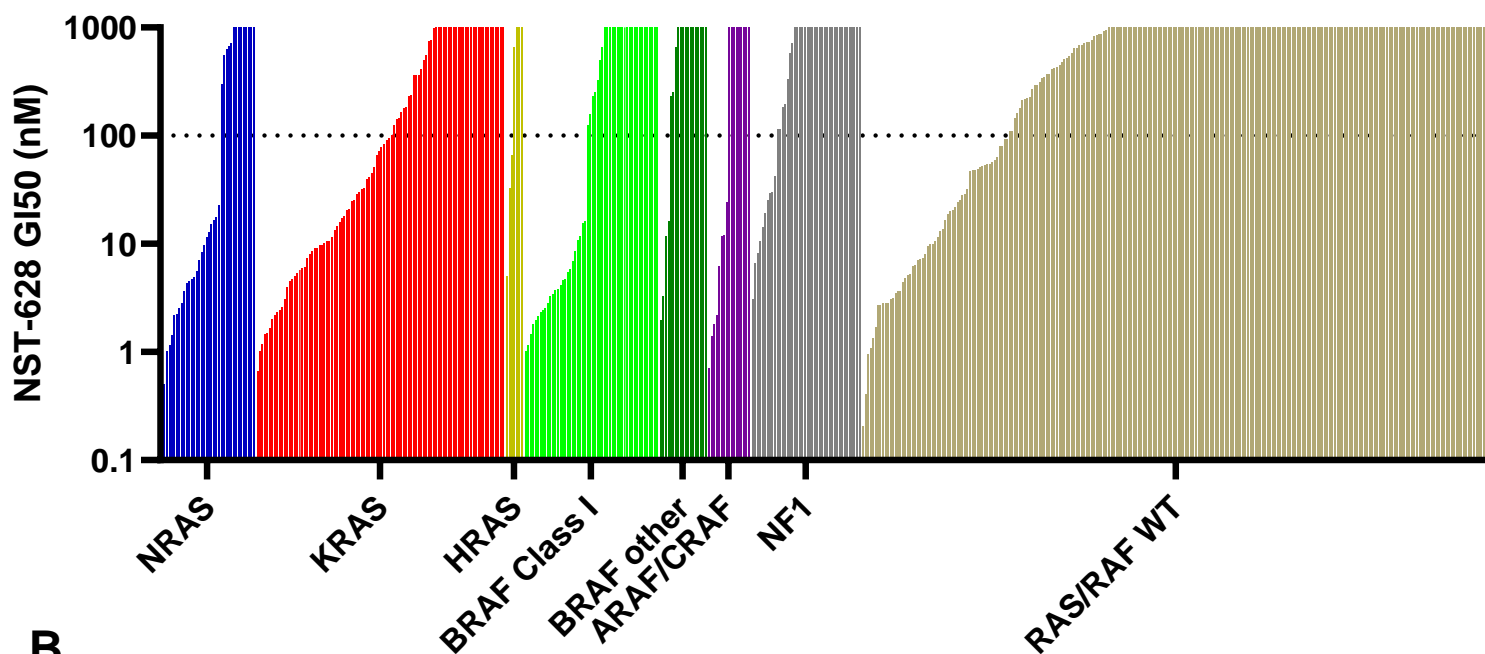

**B**

|                    | NRAS | KRAS | BRAF Class I | BRAF other | HRAS | NF1  | ARAF/CRAF | RAS/RAF WT |
|--------------------|------|------|--------------|------------|------|------|-----------|------------|
| GI50 $\leq$ 100 nM | 25   | 60   | 17           | 6          | 4    | 11   | 9         | 67         |
| Total models       | 38   | 107  | 30           | 19         | 8    | 45   | 17        | 289        |
| Sensitive (%)      | 65.8 | 56.1 | 56.7         | 31.6       | 50   | 24.4 | 52.9      | 23.2       |

**Supplementary Figure S7** (A) OMNI cell line panel treated was treated with a dose-response of NST-628 for between 3 and 7 days and viability was measured by CellTiter-Glo. (B) Response rates in each mutational background were calculated for models with a GI50 of  $\leq$  100 nM.

# Supplementary Figure S8

Related to Figure 4

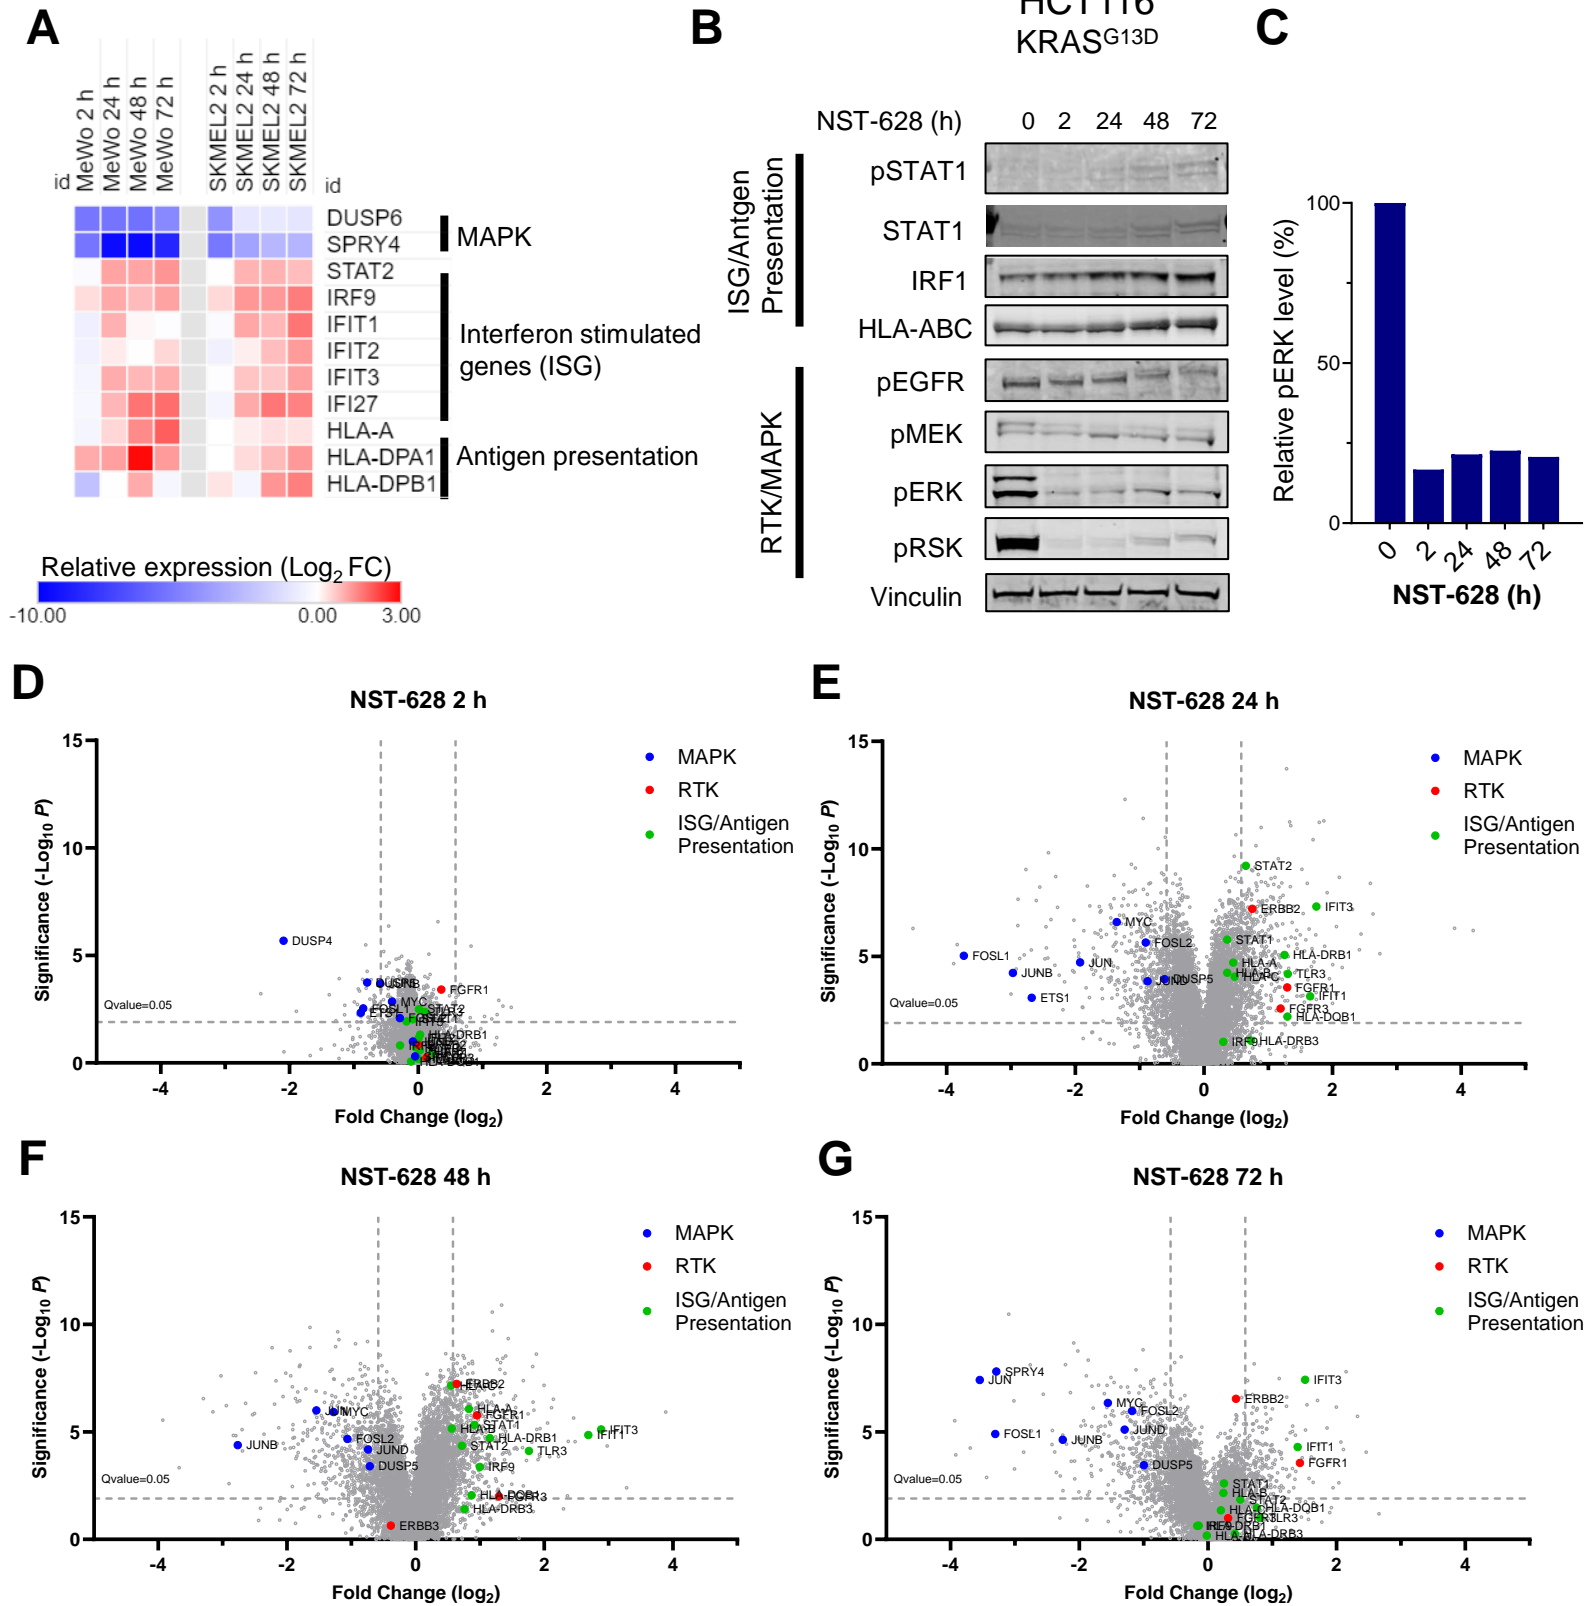

**Supplementary Figure S8** (A) Differentially expressed genes (RNAseq) of MeWo and SKMEL-2 cell lines treated with NST-628 for 2-72 h (B) HCT116 cells treated with 20 nM NST-628 for 2-72 h. A blot analysis was performed for phospho(Y701)- and total STAT1, IRF1, HLA-ABC, phospho-EGFR (Y1068) phospho-MEK, phospho-ERK, phospho-RSK and vinculin as a loading control. (C) Densitometry analysis of phospho-ERK in B. (D-G) Global proteomics in the HCT116 cell line after 2, 24, 48, or 72 h of NST-628 treatment

# Supplementary Figure S9

Related to Figure 4

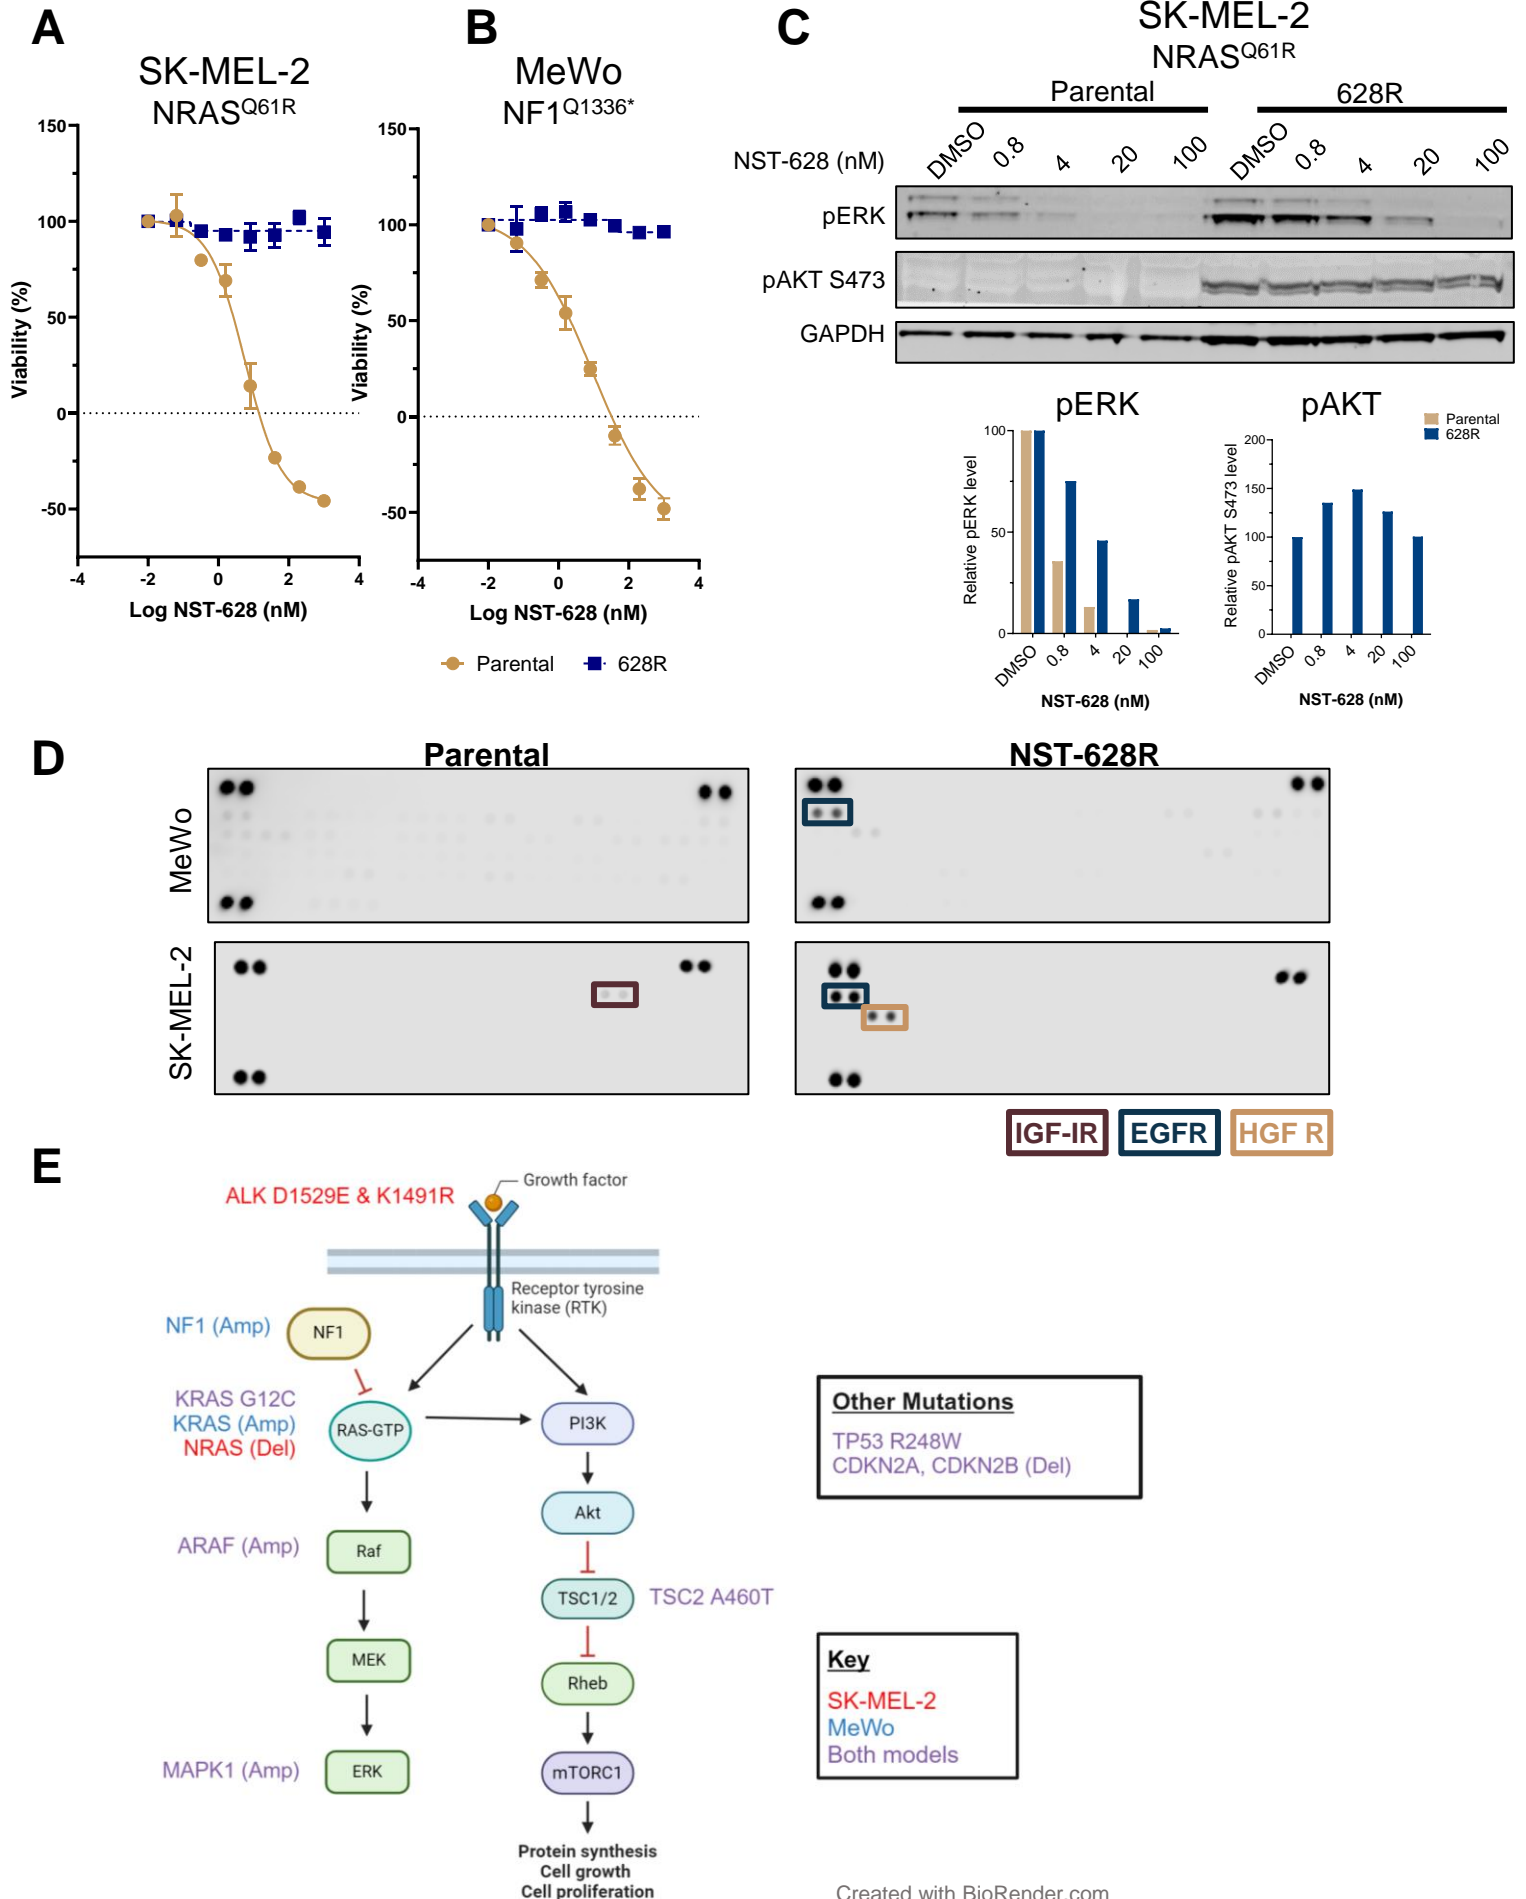

**Supplementary Figure S9** (A) SK-MEL-2 and (B) MeWo parental and NST-628 resistant cell lines were treated with a dose response of NST-628 for 72 h and viability was assessed by CellTiter-Glo. (C) SK-MEL-2 parental and NST-628 resistant cell lines were treated with indicated concentrations of NST-628 (4-100 nM) for 2 h and blot analysis was performed phospho-ERK, phospho-AKT, and vinculin as a loading control. Densitometry analysis was performed for phospho-ERK and phospho-AKT. (D) RTK array analysis for MeWo and SK-MEL-2 parental and NST-628 resistant cell lines. (E) Summary of whole exome sequencing analysis for NST-628 resistant MeWo and SK-MEL-2 cell lines compared to parental cell lines. Genes are categorized as mutant in SK-MEL-2 (red), MeWo (blue), both cell lines (purple).

# Supplementary Figure S10

Related to Figure 5

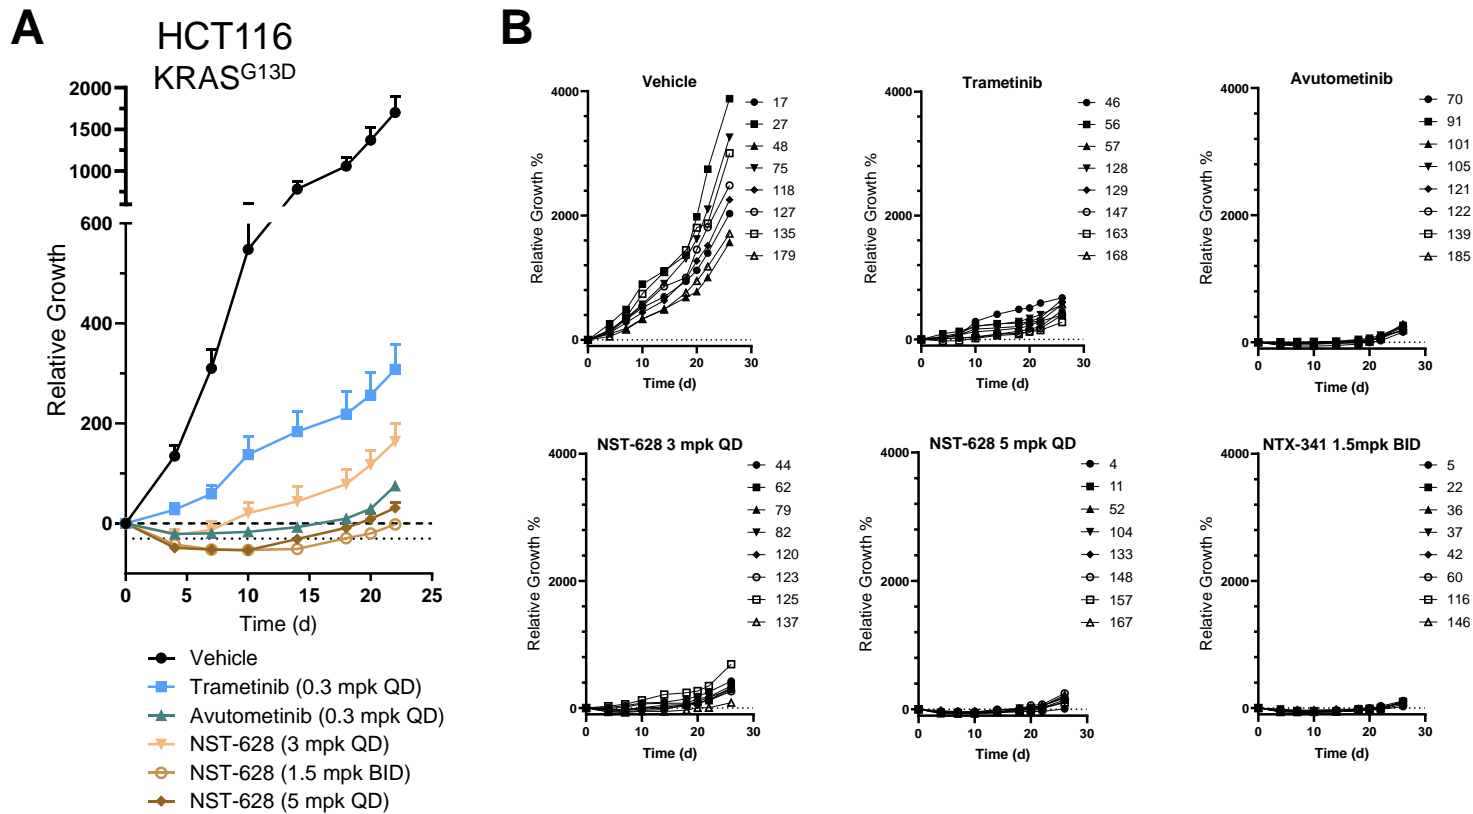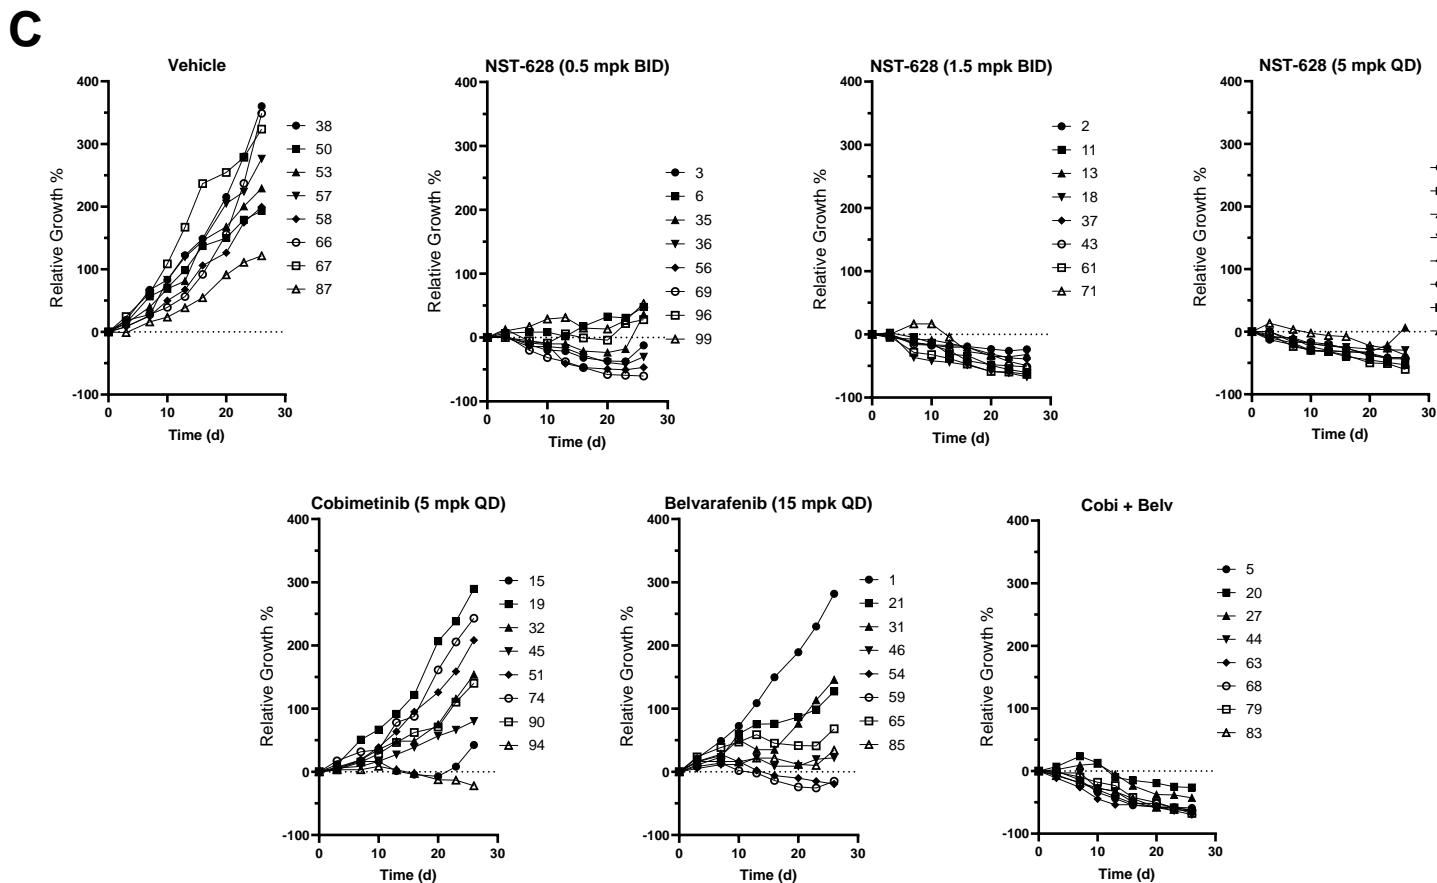

**Supplementary Figure S10.** (A) Tumor volume of HCT116 tumors treated with 0.3 mg/kg QD trametinib, 0.3 mg/kg QD avutometinib, 3 mg/kg QD, 5 mg/kg QD, or 1.5 mg/kg BID NST-628; tumors are normalized to D0 starting volume (B) Individual tumor volumes of mice from panel A (C) Individual IPC-298 tumors from Figure 5 treated with 0.5 mg/kg BID, 1.5 mg/kg BID, or 5 mg/kg QD NST-628, cobimetinib (5 mg/kg QD), belvarafenib (15mg/kg QD), or a combination of cobimetinib (5 mg/kg daily) and belvarafenib (15 mg/kg)

# Supplementary Figure S11

## Related to Figure 6

**A**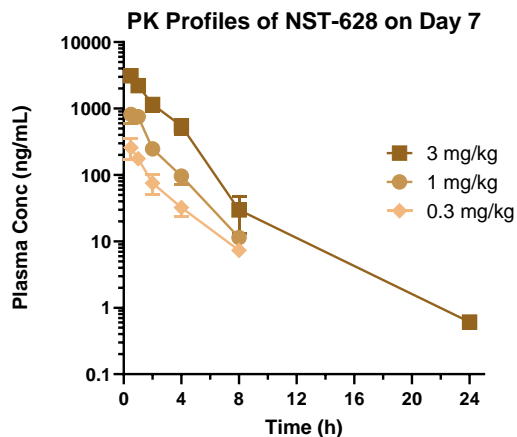**B**

### Simulated Human Oral PK Profiles of NST-628 Following a 2 mg and 4 mg QD Oral Dose

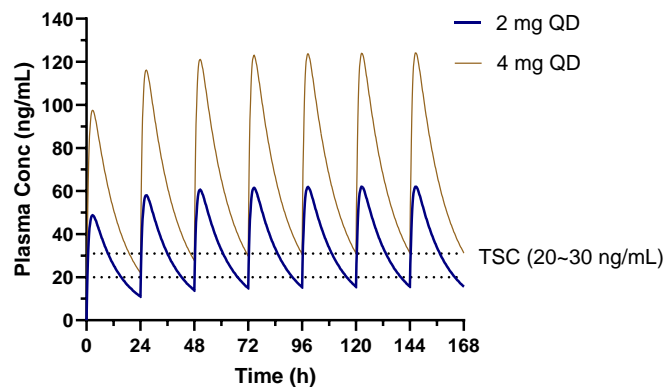**C**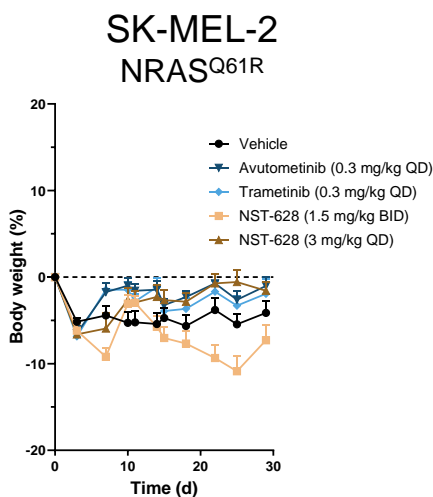**D**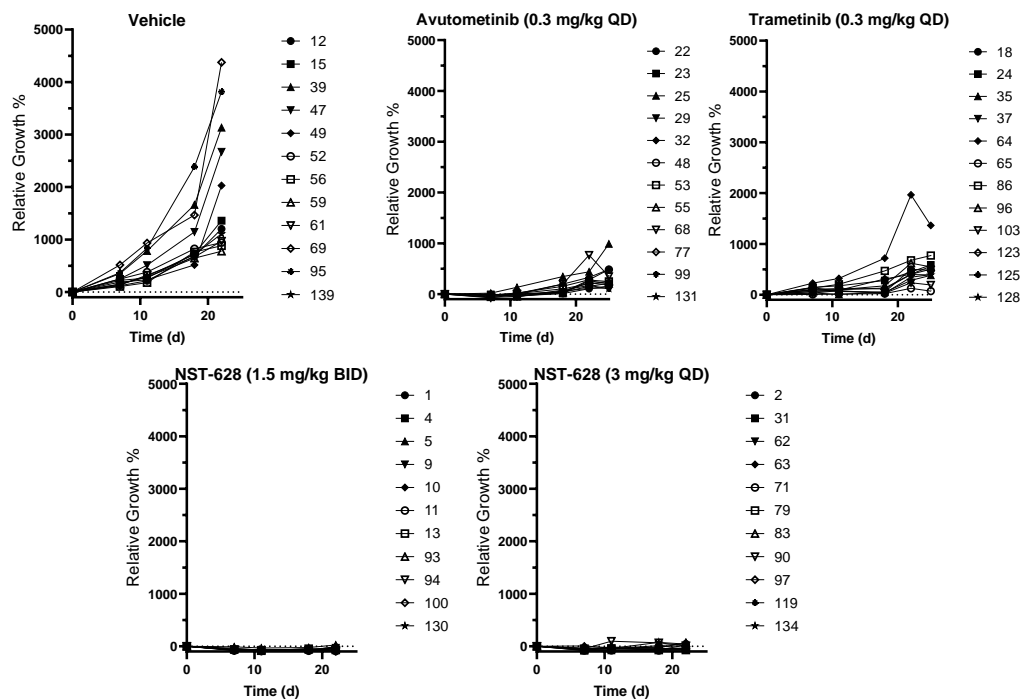**E**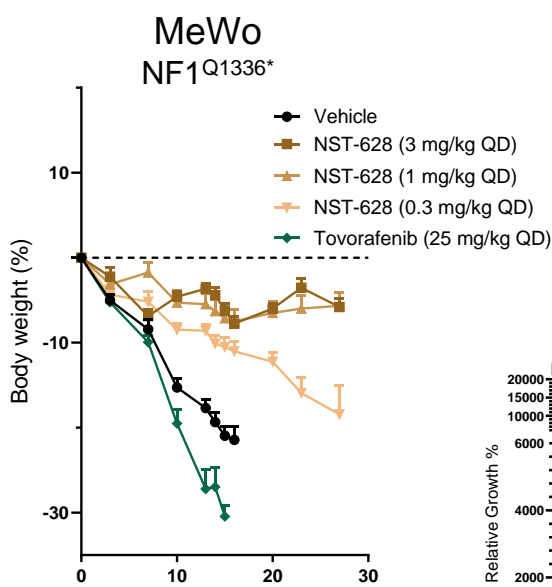**F**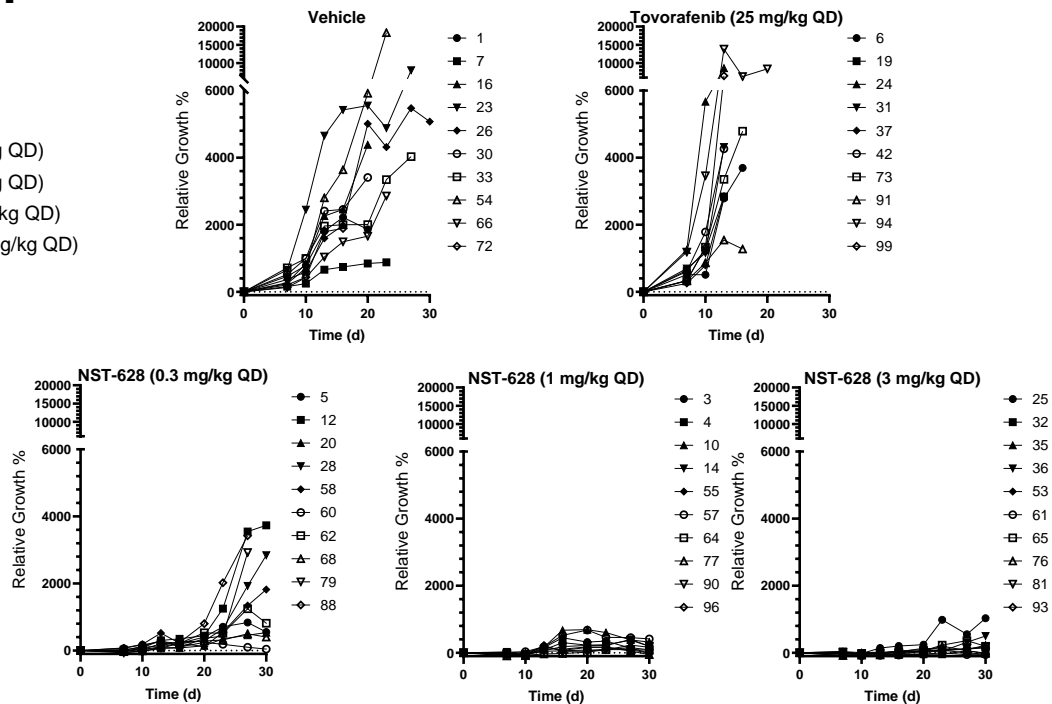

**Supplementary Figure S11.** (A) NST-628 blood plasma levels in mice treated with 0.3, 1, or 3 mg/kg NST-628 QD for 7 days. Samples were collected and analyzed by LC/MS/MS. (B) Human oral PK profiles are simulated based on predicted PK modeling parameters and assuming  $F\% = 50\%$  and tumor stasis concentration (TSC) is based on pERK readouts from the HCT116 model in Figure 5 (C) Mouse body weights and (D) individual tumor volumes of SK-MEL-2-luc tumors from Figure 6 treated with treated with 0.3 mg/kg QD trametinib, 0.3 mg/kg QD avutometinib, 3 mg/kg QD or 1.5 mg/kg BID NST-628 (E) Mouse body weights and (F) individual tumor volumes of MeWo-luc tumors from Figure 6 treated with 25 mg/kg QD tovorafenib or 0.3, 1, 3 mg/kg QD NST-628.



# Supplementary Figure S12

Related to Figure 7

**A**

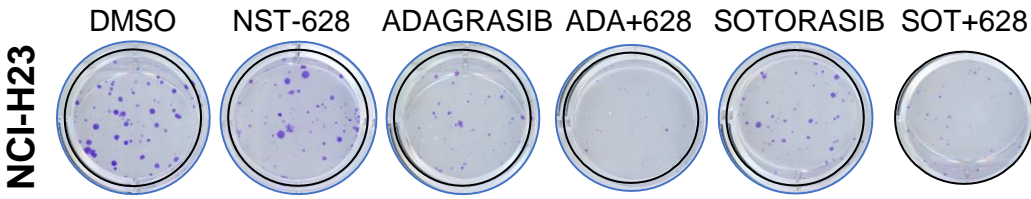

**B**

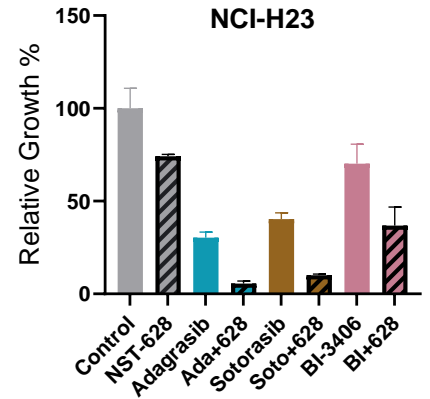

**C**

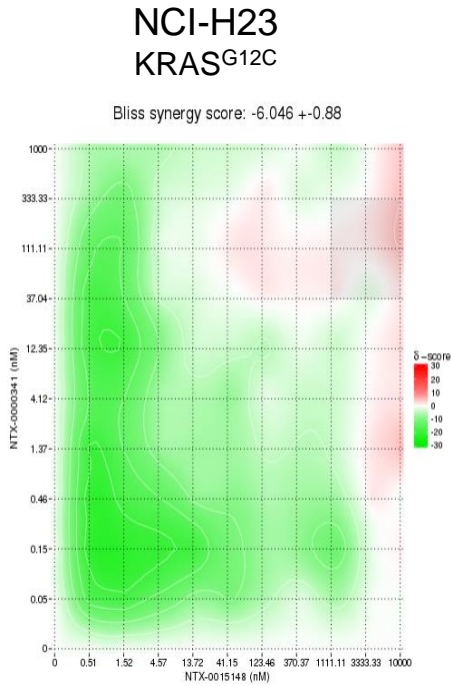

**D**

| Cell line  | Adagrasib | Sotorasib |
|------------|-----------|-----------|
| NCI-H23    | -3.646    | -6.046    |
| NCI-H358   | 4.049     | -0.891    |
| NCI-H1792  | -0.878    | -4.305    |
| NCI-H2030  | -6.345    | -4.132    |
| NCI-H2122  | -2.5      | -1.727    |
| MIA PaCa-2 | -7.923    | -11.348   |
| LU99       | -3.963    | -4.245    |

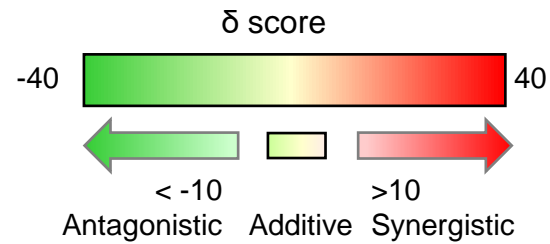

**E**

NCI-H358  
KRAS<sup>G12C</sup>

4 h                      48 h

Control   Sotorasib   NST-628   628+soto   Control   Sotorasib   NST-628   628+soto

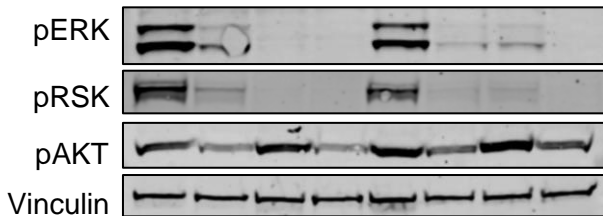

**F**

NCI-H23  
KRAS<sup>G12C</sup>

4 h                      48 h

Control   Sotorasib   NST-628   628+soto   Control   Sotorasib   NST-628   628+soto

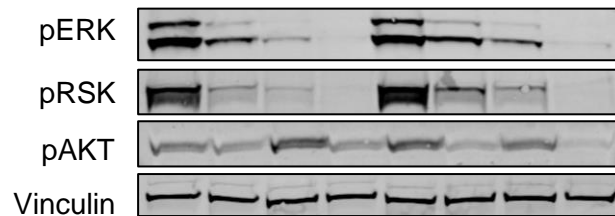

**Supplementary Figure S12.** (A) NCI-H23 cells treated with 10 nM NST-628, 100 nM adagrasib, 100 nM sotorasib, or a combination of NST-628 with adagrasib or sotorasib for 14 days and stained with crystal violet (B) Quantification of assay in A. (C) Bliss Synergy score plot of the combination of a dose response of NST-628 combined with a dose response of sotorasib read out by CTG after 72 h of treatment in the NCI-H23 cell line. (D) Summary of Bliss Synergy scores across KRAS<sup>G12C</sup> mutant models treated with dose response combinations of NST-628 with sotorasib or adagrasib treated as in C. (E) NCI-H358 of (F) NCI-H23 treated with 20 nM NST-628, 100 nM sotorasib, or combination for 4 and 48 h and blot analysis for phospho-ERK, phospho-RSK, phospho-AKT, and vinculin as a loading control
