# Supplementary material for: The Pan-RAF–MEK Nondegrading Molecular Glue NST-628 Is a Potent and Brain-Penetrant Inhibitor of the RAS–MAPK Pathway with Activity across Diverse RAS- and RAF-Driven Cancers
Source: PubMed Central journal article supplement — Cancer Discov. 2024 Apr 19;14(7):1190–205. doi: 10.1158/2159-8290.CD-24-0139 (PMC11215411; doi:10.1158/2159-8290.cd-24-0139), 2024-04-19
Supplement: cd-24-0139_supplementary_tables_2-5_suppst2-5.pdf [file cd-24-0139_supplementary_tables_2-5_suppst2-5.pdf]

## Supplementary Table 2

| Structure                            | MEK1-ARAF with NST-628 | MEK1-BRAF with NST-628 | MEK1-CRAF with NST-628  |
|--------------------------------------|------------------------|------------------------|-------------------------|
| PDB Entry                            | 9AXM                   | 9AXX                   | 9AYA                    |
| <b>Data collection</b>               |                        |                        |                         |
| Space group                          | C222 <sub>1</sub>      | P12 <sub>1</sub> 1     | C121                    |
| Cell dimensions                      |                        |                        |                         |
| a,b,c (Å)                            | 80.209 173.429 187.769 | 72.23 82.40 121.57     | 149.725 58.202 162.347  |
| $\alpha, \beta, \gamma$ (°)          | 90.000 90.000 90.000   | 90.00 105.69 90.00     | 90.00 95.59 90.00       |
| Resolution (Å)                       | 47.46-2.42 (2.50-2.42) | 58.52-2.07 (2.11-2.07) | 161.57-2.59 (2.69-2.59) |
| R <sub>merge</sub>                   | 0.107 (1.179)          | 0.068 (0.709)          | 0.075 (0.544)           |
| I/ $\sigma$ (I)                      | 17.7 (2.2)             | 17.6 (2.1)             | 13.0 (2.3)              |
| Completeness (%)                     | 100.0 (100.0)          | 99.2 (98.0)            | 99.9 (99.9)             |
| Redundancy                           | 13.6 (14.0)            | 7.1 (7.2)              | 4.5 (3.7)               |
| <b>Refinement</b>                    |                        |                        |                         |
| R <sub>work</sub> /R <sub>free</sub> | 0.2604/0.3006          | 0.2130/0.2480          | 0.2120/0.2566           |
| R.m.s deviations                     |                        |                        |                         |
| Bond lengths (Å)                     | 0.002                  | 0.003                  | 0.004                   |
| Bond angles (°)                      | 0.442                  | 0.557                  | 0.565                   |
| Ramachandran statistics              |                        |                        |                         |
| Favored (%)                          | 96.13                  | 97.58                  | 97.09                   |
| Allowed (%)                          | 3.87                   | 2.24                   | 2.73                    |
| Outliers (%)                         | 0.00                   | 0.18                   | 0.18                    |

Supplementary Table 2. Data collection and refinement statistics for crystal structures of NST-628 with MEK1 and active RAF. Values in parentheses represent the highest resolution shell.

## Supplementary Table 3

| Structure                            | MEK1-KSR1 with NST-628 |
|--------------------------------------|------------------------|
| PDB Entry                            | 9AXH                   |
| <b>Data collection</b>               |                        |
| Space group                          | C121                   |
| Cell dimensions                      |                        |
| a,b,c (Å)                            | 249.87 67.08 74.40     |
| $\alpha, \beta, \gamma$ (°)          | 90.00 90.25 90.00      |
| Resolution (Å)                       | 52.24-2.81 (2.96-2.81) |
| R <sub>merge</sub>                   | 0.051 (0.670)          |
| I/ $\sigma$ (I)                      | 18.0 (2.7)             |
| Completeness (%)                     | 99.9% (99.8%)          |
| Redundancy                           | 6.9 (7.1)              |
| <b>Refinement</b>                    |                        |
| R <sub>work</sub> /R <sub>free</sub> | 0.2031/0.2533          |
| R.m.s deviations                     |                        |
| Bond lengths (Å)                     | 0.004                  |
| Bond angles (°)                      | 0.627                  |
| Ramachandran statistics              |                        |
| Favored (%)                          | 96.88                  |
| Allowed (%)                          | 3.12                   |
| Outliers (%)                         | 0.00                   |

Supplementary Table 3. Data collection and refinement statistics for crystal structure of MEK1-KSR1 complex with NST-628. Values in parentheses represent the highest resolution shell.

## Supplementary Table 4

| Structure                            | MEK1-BRAF with NST-628  | MEK1-CRAF with NST-628                        |
|--------------------------------------|-------------------------|-----------------------------------------------|
| <b>PDB Entry</b>                     | 9AXY                    | 9AY7                                          |
| <b>Data collection</b>               |                         |                                               |
| Space group                          | P3 <sub>1</sub> 21      | P2 <sub>1</sub> 2 <sub>1</sub> 2 <sub>1</sub> |
| Cell dimensions                      |                         |                                               |
| a,b,c (Å)                            | 117.097 117.097 129.424 | 60.030 107.950 116.240                        |
| $\alpha, \beta, \gamma$ (°)          | 90.00 90.00 120.00      | 90.00 90.00 90.00                             |
| Resolution (Å)                       | 53.34-3.60(3.94-3.60)   | 48.95-2.41 (2.50-2.41)                        |
| R <sub>merge</sub>                   | 0.257 (0.918)           | 0.112 (1.148)                                 |
| I/ $\sigma$ (I)                      | 8.5 (2.4)               | 15.8 (2.2)                                    |
| Completeness (%)                     | 99.5% (98.2%)           | 100.0% (99.8%)                                |
| Redundancy                           | 12.6 (8.7)              | 13.3 (13.8)                                   |
| <b>Refinement</b>                    |                         |                                               |
| R <sub>work</sub> /R <sub>free</sub> | 0.1879/0.2375           | 0.2012/0.2359                                 |
| R.m.s deviations                     |                         |                                               |
| Bond lengths (Å)                     | 0.003                   | 0.002                                         |
| Bond angles (°)                      | 0.650                   | 0.436                                         |
| Ramachandran statistics              |                         |                                               |
| Favored (%)                          | 95.35                   | 96.67                                         |
| Allowed (%)                          | 4.48                    | 3.33                                          |
| Outliers (%)                         | 0.17                    | 0.00                                          |

Supplementary Table 4. Data collection and refinement statistics for crystal structures of NST-628 with MEK1 and inactive RAF. Values in parentheses represent the highest resolution shell.

# Supplemental Table 5

| Structure                                           | MEK1/CRAF/14-3-3/NST-628<br>(EMDB-43931, PDB 9AXA) | MEK1/CRAF/NST-628 focused<br>(EMDB-43932, PDB 9AXC) |
|-----------------------------------------------------|----------------------------------------------------|-----------------------------------------------------|
| <b>Data collection and processing</b>               |                                                    |                                                     |
| Magnification                                       | 120,000x                                           | 120,000x                                            |
| Voltage (kV)                                        | 200                                                | 200                                                 |
| Electron exposure (e <sup>-</sup> /Å <sup>2</sup> ) | 50                                                 | 50                                                  |
| Defocus range (μm)                                  | 1 to 2.5                                           | 1 to 2.5                                            |
| Pixel size (Å)                                      | 1.207                                              | 1.207                                               |
| Symmetry                                            | C1                                                 | C1                                                  |
| Initial particle images (no.)                       | 1,270,842                                          | 1,270,842                                           |
| Final particle images (no.)                         | 83,248                                             | 83,248                                              |
| Map resolution at FSC=0.143 (Å)                     | 4.36                                               | 4.16                                                |
| <b>Refinement</b>                                   |                                                    |                                                     |
| Initial model used                                  | 4IEA, MEK/CRAF active                              | MEK/CRAF active                                     |
| Model resolution at FSC=0.143 (Å)                   | 3.78                                               | 3.67                                                |
| Model composition                                   |                                                    |                                                     |
| Non-hydrogen atoms                                  | 12423                                              | 8677                                                |
| Protein residues                                    | 1553                                               | 1079                                                |
| R.m.s deviations                                    |                                                    |                                                     |
| Bond lengths (Å)                                    | 0.004                                              | 0.004                                               |
| Bond angles (°)                                     | 0.952                                              | 0.960                                               |
| Validation                                          |                                                    |                                                     |
| MolProbity score                                    | 1.68                                               | 1.63                                                |
| Clashscore                                          | 6.73                                               | 5.98                                                |
| Poor rotamers (%)                                   | 0.44                                               | 0.21                                                |
| Ramachandran plot                                   |                                                    |                                                     |
| Favored (%)                                         | 95.58                                              | 95.64                                               |
| Allowed (%)                                         | 4.29                                               | 4.17                                                |
| Disallowed (%)                                      | 0.13                                               | 0.19                                                |

Supplementary Table 5. Cryo-EM data collection, processing, and model statistics
